# Supplementary material for: Sources of nitrous oxide and fate of mineral nitrogen in sub-Arctic permafrost peat soils
Source: Copernicus journal article supplement (doi:10.5194/bg-2021-228), 2021-08-26
Supplement: Supplementary file [file bg-2021-228-AC2-supplement.pdf]

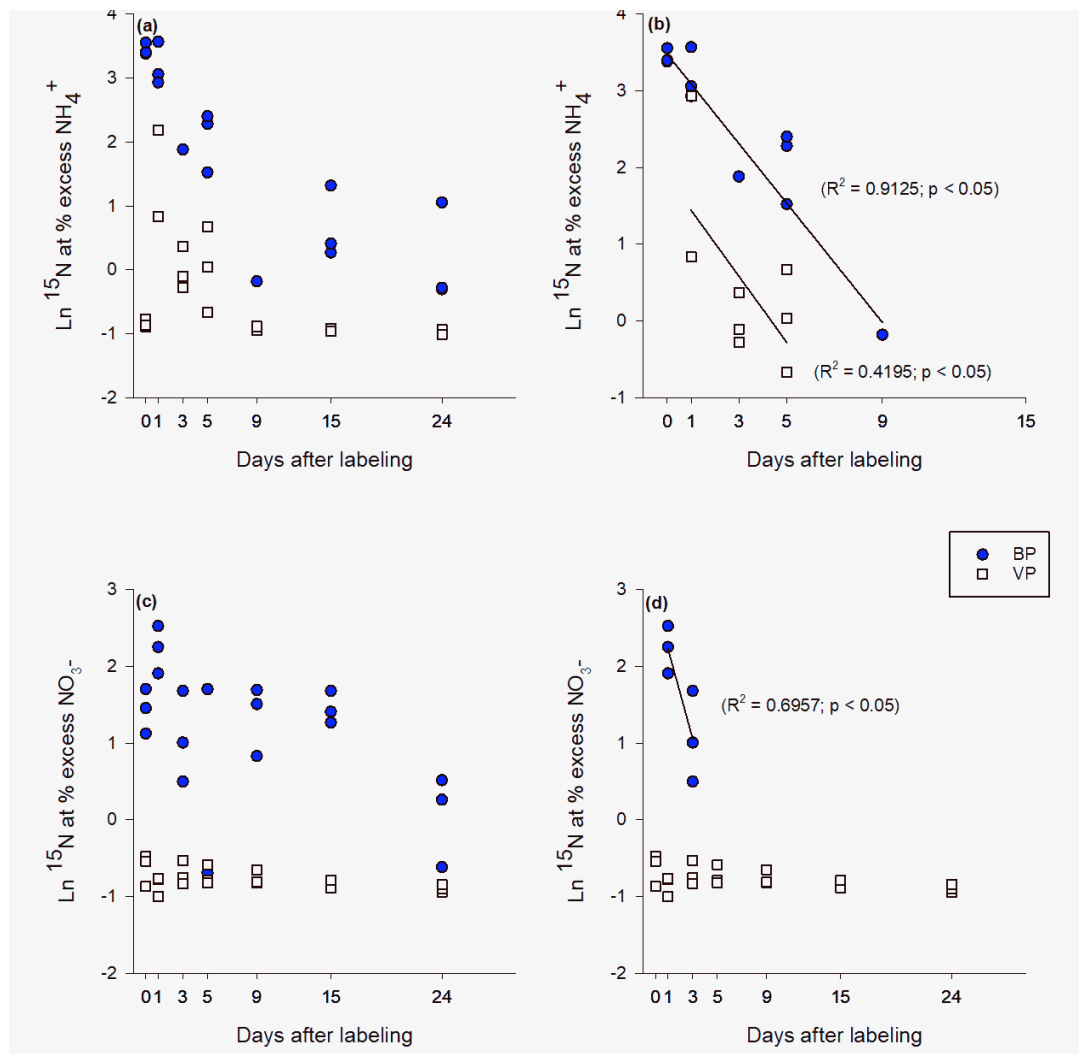

**Figure S3.** Change in natural logarithmic of  $^{15}\text{N}$  at% of (a - b)  $\text{NH}_4^+$  and (c - d)  $\text{NO}_3^-$  in BP and VP soil over total study period.

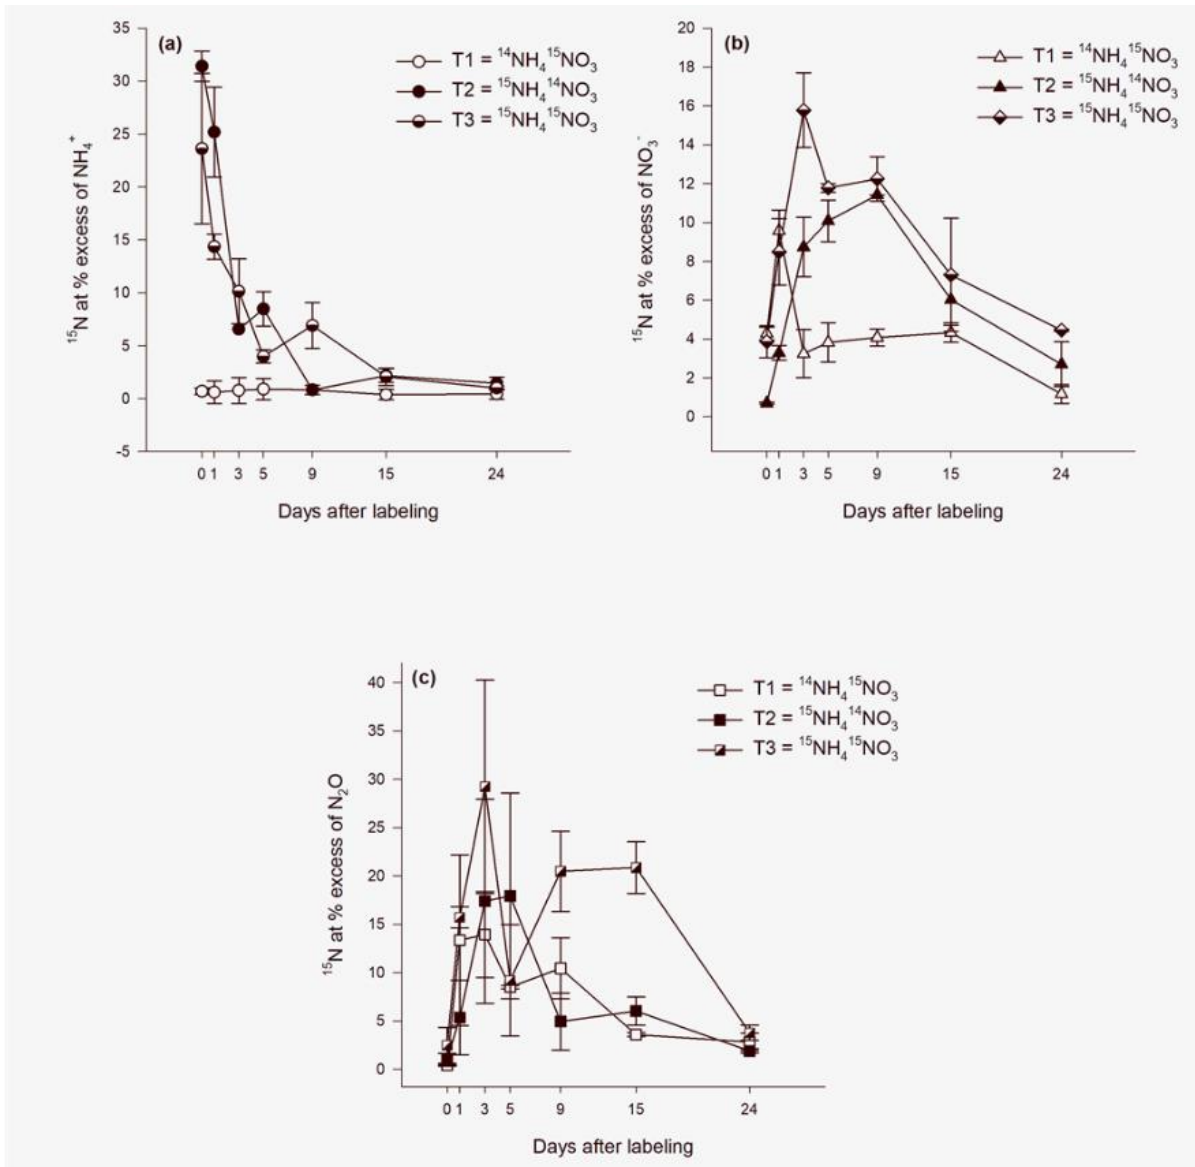

**Figure S4.**  $^{15}\text{N}$  at% excess (APE) of (a)  $\text{NH}_4^+$  (b)  $\text{NO}_3^-$  and (c)  $\text{N}_2\text{O}$  during the sampling period for all three treatments applied in BP surfaces. (Values are mean  $\pm$  S.E, n=3). Only data from treatment 1 (T1 =  $^{15}\text{N}$ - $\text{NO}_3^-$ ) and treatment 2 (T2 =  $^{15}\text{N}$ - $\text{NH}_4^+$ ) was used in the calculations of the gross N transformation rates.

Table S1. Gross N process rates from bare peat surfaces (BP)

|           |         | $\mu\text{g N cm}^{-3} \text{ d}^{-1}$ | $\mu\text{g N cm}^{-3} \text{ d}^{-1}$ | $\mu\text{g N cm}^{-3} \text{ d}^{-1}$ | $\mu\text{g N cm}^{-3} \text{ d}^{-1}$ |
|-----------|---------|----------------------------------------|----------------------------------------|----------------------------------------|----------------------------------------|
| (a)       |         | Mineralisation                         | NH <sub>4</sub> consumption            | Nitrification                          | NO <sub>3</sub> consumption            |
| 24 hours  | average | 8,76                                   | 8,10                                   | 0,30                                   | 0,23                                   |
|           | std     | 2,36                                   | 1,93                                   | 0,42                                   | 0,84                                   |
|           | se      | 1,36                                   | 1,11                                   | 0,24                                   | 0,48                                   |
| 72 hours  | average | 3,31                                   | 3,50                                   | 0,87                                   | 0,92                                   |
|           | std     | 1,97                                   | 2,70                                   | 0,88                                   | 0,53                                   |
|           | se      | 1,14                                   | 1,56                                   | 0,51                                   | 0,31                                   |
| 120 hours | average | 5,19                                   | 5,63                                   | 0,15                                   | 0,02                                   |
|           | std     | 0,49                                   | 0,88                                   | 0,08                                   | 0,24                                   |
|           | se      | 0,28                                   | 0,51                                   | 0,05                                   | 0,14                                   |
| 216 hours | average | 1,87                                   | 1,97                                   | 0,02                                   | -0,17                                  |
|           | std     | 0,62                                   | 0,79                                   | 0,17                                   | 0,36                                   |
|           | se      | 0,36                                   | 0,45                                   | 0,10                                   | 0,21                                   |
| 360 hours | average | 1,45                                   | 1,13                                   | 0,00                                   | -0,09                                  |
|           | std     | 0,63                                   | 0,80                                   | 0,13                                   | 0,23                                   |
|           | se      | 0,37                                   | 0,46                                   | 0,07                                   | 0,13                                   |
| 24 days   | average | 0,88                                   | 0,79                                   | 0,10                                   | 0,11                                   |
|           | std     | 0,29                                   | 0,27                                   | 0,05                                   | 0,07                                   |
|           | se      | 0,17                                   | 0,16                                   | 0,03                                   | 0,04                                   |

|           |         | $\mu\text{g N g}^{-1} \text{ d}^{-1}$ | $\mu\text{g N g}^{-1} \text{ d}^{-1}$ | $\mu\text{g N g}^{-1} \text{ d}^{-1}$ | $\mu\text{g N g}^{-1} \text{ d}^{-1}$ |
|-----------|---------|---------------------------------------|---------------------------------------|---------------------------------------|---------------------------------------|
| (b)       |         | Mineralisation                        | NH <sub>4</sub> consumption           | Nitrification                         | NO <sub>3</sub> consumption           |
| 24 hours  | average | 32,45                                 | 29,98                                 | 1,11                                  | 0,84                                  |
|           | std     | 8,72                                  | 7,13                                  | 1,57                                  | 3,11                                  |
|           | se      | 5,04                                  | 4,12                                  | 0,91                                  | 1,79                                  |
| 72 hours  | average | 12,27                                 | 12,97                                 | 3,21                                  | 3,41                                  |
|           | std     | 7,31                                  | 9,98                                  | 3,27                                  | 1,98                                  |
|           | se      | 4,22                                  | 5,76                                  | 1,89                                  | 1,14                                  |
| 120 hours | average | 19,23                                 | 20,84                                 | 0,55                                  | 0,07                                  |
|           | std     | 1,80                                  | 3,27                                  | 0,31                                  | 0,89                                  |
|           | se      | 1,04                                  | 1,89                                  | 0,18                                  | 0,51                                  |
| 216 hours | average | 6,94                                  | 7,31                                  | 0,08                                  | 0,00                                  |
|           | std     | 2,28                                  | 2,92                                  | 0,63                                  | 1,33                                  |
|           | se      | 1,32                                  | 1,68                                  | 0,36                                  | 0,77                                  |
| 360 hours | average | 5,36                                  | 4,18                                  | 0,00                                  | 0,00                                  |
|           | std     | 2,35                                  | 2,96                                  | 0,47                                  | 0,85                                  |
|           | se      | 1,36                                  | 1,71                                  | 0,27                                  | 0,49                                  |
| 24 days   | average | 3,26                                  | 2,91                                  | 0,38                                  | 0,42                                  |
|           | std     | 1,06                                  | 1,00                                  | 0,19                                  | 0,26                                  |
|           | se      | 0,61                                  | 0,58                                  | 0,11                                  | 0,15                                  |

Values are mean of three plots (n = 3).

Table S2. Gross N process rates from vegetated surfaces (VP)

|           |         | $\mu\text{g N cm}^{-3} \text{ d}^{-1}$ | $\mu\text{g N cm}^{-3} \text{ d}^{-1}$ | $\mu\text{g N cm}^{-3} \text{ d}^{-1}$ | $\mu\text{g N cm}^{-3} \text{ d}^{-1}$ |
|-----------|---------|----------------------------------------|----------------------------------------|----------------------------------------|----------------------------------------|
| (a)       |         | Mineralisation                         | NH <sub>4</sub> consumption            | Nitrification                          | NO <sub>3</sub> consumption            |
| 24 hours  | average | 0,00                                   | 0,00                                   | 0,02                                   | 0,04                                   |
|           | std     | 1,94                                   | 3,32                                   | 0,13                                   | 0,13                                   |
|           | se      | 1,12                                   | 1,92                                   | 0,08                                   | 0,08                                   |
| 72 hours  | average | 0,55                                   | 0,43                                   | 0,00                                   | 0,01                                   |
|           | std     | 0,96                                   | 0,97                                   | 0,02                                   | 0,02                                   |
|           | se      | 0,55                                   | 0,56                                   | 0,01                                   | 0,01                                   |
| 120 hours | average | 1,15                                   | 1,11                                   | 0,00                                   | 0,00                                   |
|           | std     | 0,76                                   | 0,66                                   | 0,01                                   | 0,01                                   |
|           | se      | 0,44                                   | 0,38                                   | 0,01                                   | 0,01                                   |
| 216 hours | average | 0,63                                   | 0,63                                   | 0,00                                   | 0,00                                   |
|           | std     | 0,46                                   | 0,43                                   | 0,00                                   | 0,00                                   |
|           | se      | 0,26                                   | 0,25                                   | 0,00                                   | 0,00                                   |
| 360 hours | average | 0,37                                   | 0,36                                   | 0,00                                   | 0,00                                   |
|           | std     | 0,25                                   | 0,25                                   | 0,01                                   | 0,00                                   |
|           | se      | 0,15                                   | 0,14                                   | 0,00                                   | 0,00                                   |
| 24 days   | average | 0,22                                   | 0,23                                   | 0,00                                   | 0,00                                   |
|           | std     | 0,18                                   | 0,15                                   | 0,00                                   | 0,00                                   |
|           | se      | 0,10                                   | 0,09                                   | 0,00                                   | 0,00                                   |

|           |         | $\mu\text{g N g}^{-1} \text{ d}^{-1}$ | $\mu\text{g N g}^{-1} \text{ d}^{-1}$ | $\mu\text{g N g}^{-1} \text{ d}^{-1}$ | $\mu\text{g N g}^{-1} \text{ d}^{-1}$ |
|-----------|---------|---------------------------------------|---------------------------------------|---------------------------------------|---------------------------------------|
| (b)       |         | Mineralisation                        | NH <sub>4</sub> consumption           | Nitrification                         | NO <sub>3</sub> consumption           |
| 24 hours  | average | 0,00                                  | 0,00                                  | 0,43                                  | 0,87                                  |
|           | std     | 38,70                                 | 66,35                                 | 2,61                                  | 2,61                                  |
|           | se      | 22,34                                 | 38,31                                 | 1,51                                  | 1,51                                  |
| 72 hours  | average | 10,96                                 | 8,60                                  | 0,00                                  | 0,20                                  |
|           | std     | 19,21                                 | 19,42                                 | 0,45                                  | 0,45                                  |
|           | se      | 11,09                                 | 11,21                                 | 0,26                                  | 0,26                                  |
| 120 hours | average | 22,97                                 | 22,22                                 | 0,00                                  | 0,00                                  |
|           | std     | 15,15                                 | 13,15                                 | 0,18                                  | 0,18                                  |
|           | se      | 8,75                                  | 7,60                                  | 0,10                                  | 0,10                                  |
| 216 hours | average | 12,63                                 | 12,63                                 | 0,08                                  | 0,10                                  |
|           | std     | 9,18                                  | 8,62                                  | 0,08                                  | 0,08                                  |
|           | se      | 5,30                                  | 4,98                                  | 0,05                                  | 0,05                                  |
| 360 hours | average | 7,33                                  | 7,21                                  | 0,06                                  | 0,06                                  |
|           | std     | 5,10                                  | 4,93                                  | 0,14                                  | 0,05                                  |
|           | se      | 2,94                                  | 2,84                                  | 0,08                                  | 0,03                                  |
| 24 days   | average | 4,46                                  | 4,62                                  | 0,07                                  | 0,08                                  |
|           | std     | 3,53                                  | 2,96                                  | 0,06                                  | 0,06                                  |
|           | se      | 2,04                                  | 1,71                                  | 0,03                                  | 0,03                                  |

Values are mean of three plots (n = 3).
